# Supplementary material for: Non-covalent loading of ionic liquid-functionalized nanoparticles for bovine serum albumin: experiments and theoretical analysis
Source: Royal Society of Chemistry journal article supplement (doi:10.1039/c9ra02265a), 2019-01-01
Supplement: c9ra02265a1.pdf [file c9ra02265a1.pdf]

## Non-covalent loading of ionic liquid-functionalized nanoparticles for bovine serum albumin: experiments and theoretical analysis

Xingang Jia<sup>ab</sup>, Xiaoling Hu<sup>a\*</sup>, Wenzhen Wang<sup>b</sup>, Chunbao Du<sup>b</sup>

<sup>a</sup> School of Natural and Applied Science, Northwestern Polytechnical University, Xi'an 710072, P. R China.

<sup>b</sup> College of Chemistry and Chemical Engineering, Xi'an Shiyou University, Xi'an 710065, P. R. China.



Fig. S1 FTIR spectrum of [TMIM]Cl.



Fig. S2 <sup>1</sup>H NMR spectrum of [TMIM]Cl in CDCl<sub>3</sub>.
